# Supplementary material for: Preparations of Rectal Suppositories Containing Artesunate
Source: MDPI journal article supplement (doi:10.3390/pharmaceutics12030222), 2020-03-02
Supplement: s1 [file s1]

## Supplementary Materials: Preparations of Rectal Suppositories Containing Artesunate

Suzanne Persaud, Sandra Eid, Natalia Swiderski, Ioannis Serris and Hyunah Cho

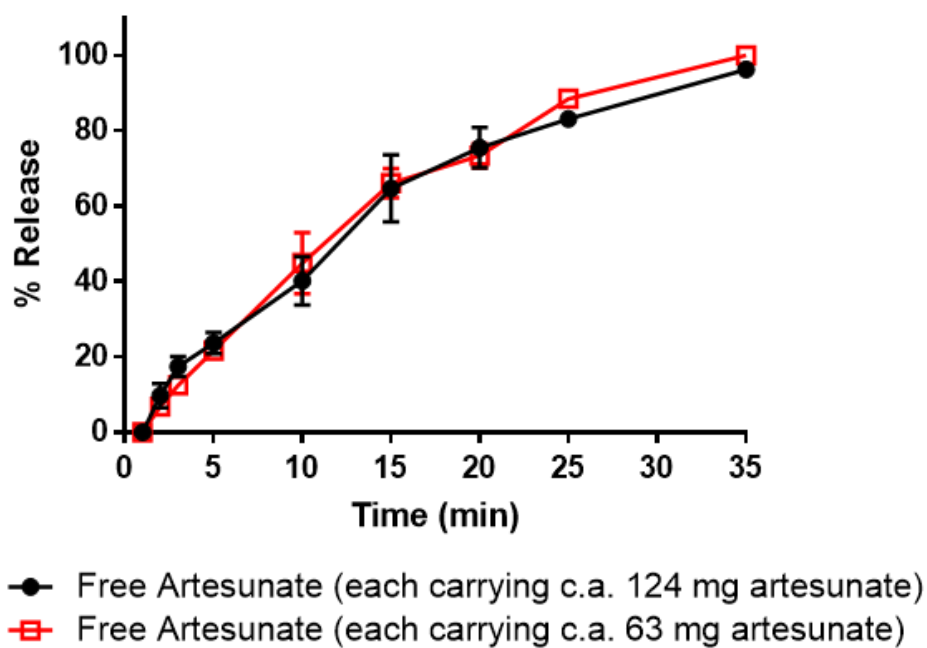

**Figure S1.** Release profiles of artesunate from suppositories each carrying 124 mg artesunate and those each carrying 63 mg of artesunate in PBS (pH 7, 37 °C).
